# Supplementary material for: Magnetic nanoparticle mediated-gene delivery for simpler and more effective transformation of Pichia pastoris
Source: Royal Society of Chemistry journal article supplement (doi:10.1039/d1na00079a), 2021-01-01
Supplement: d1na00079a1.pdf [file d1na00079a1.pdf]

**Supporting Information**

**Nanoscale Advances**

**Magnetic Nanoparticles Mediated-Gene Delivery for Simpler and More  
Effective Transformation of *Pichia pastoris***

Seyda Yildiz<sup>a</sup>, Kubra Solak<sup>b</sup>, Melek Acar<sup>a</sup>, Ahmet Mavi<sup>b,c</sup> and Yagmur Unver<sup>a\*</sup>

<sup>a</sup>Department of Molecular Biology and Genetics, Atatürk University, Erzurum 25240, Turkey

<sup>b</sup>Department of Nanoscience and Nanoengineering, Atatürk University, Erzurum 25240, Turkey

<sup>c</sup>Department of Chemistry Education, Kazım Karabekir Faculty of Education, Atatürk University, Erzurum 25240, Turkey.

E-mail: [yunver@atauni.edu.tr](mailto:yunver@atauni.edu.tr) ; [yagmurunver@yahoo.com](mailto:yagmurunver@yahoo.com)

**Table S 1.** Primer sequences used in this study

| Specific Primers | Name         | Sequencing                       |
|------------------|--------------|----------------------------------|
| Gene             | GFP Forward  | 5'-CGCGAATTCATGTCTAAAGGTGAAGA-3' |
|                  | GFP Reverse  | 5'-GGGGTACCTTTGTACAATTCATCCAT-3' |
| Vector           | pGAP Forward | 5'-GTCCTATTTCAATCAATTGAA-3'      |
|                  | 3'AOX1       | 5'-GCAAATGGCATTCTGACATCC-3'      |

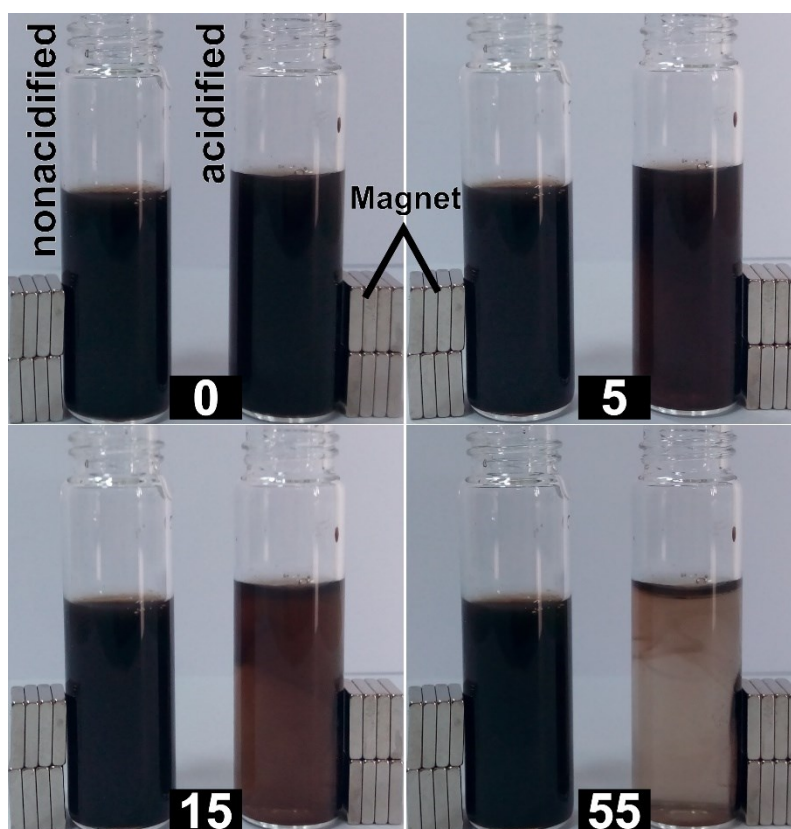

**Fig S 1.** The photos of the time-dependent magnetic accumulation of non-acidified and acidified  $\text{Fe}_3\text{O}_4$ @PEI MNPs after 0, 5, 15 and 55 seconds.

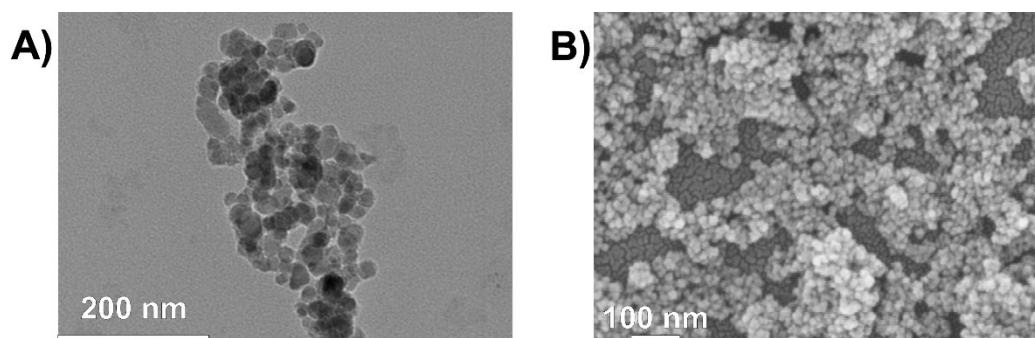

**Fig S 2.** **A.** TEM image of non-acidified  $\text{Fe}_3\text{O}_4$ @PEI MNPs and **B.** SEM image of  $\text{Fe}_3\text{O}_4$ @PEI MNPs.

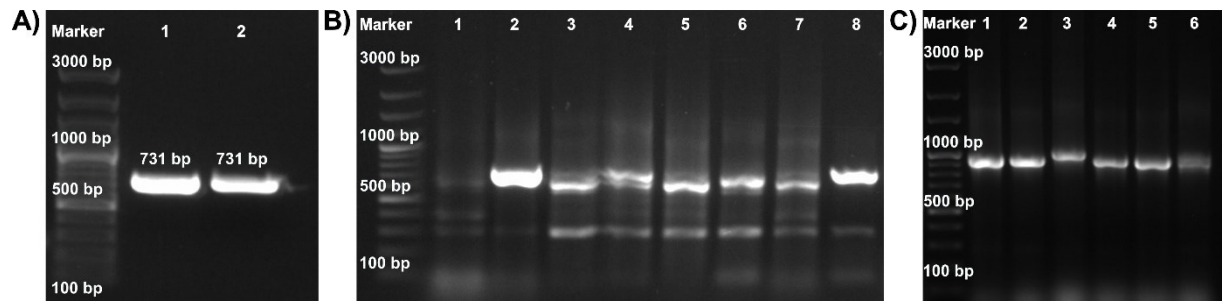

**Fig S 3.** Agarose gel electrophoresis results belong to **A)** the GFP amplification by PCR (1: reaction with 50 mM MgCl<sub>2</sub> 2: reaction without MgCl<sub>2</sub>), the colony PCR from selected *E. coli* colonies with **B)** gene-specific primers (1-8: numbers of colonies) and **C)** vector-specific primers (1-6: numbers of colonies).

|                                                                                 |        | Download ▾                                                   | Graphics  |            |                              |
|---------------------------------------------------------------------------------|--------|--------------------------------------------------------------|-----------|------------|------------------------------|
| Sequence ID: <b>Query_59613</b> Length: <b>1186</b> Number of Matches: <b>1</b> |        |                                                              |           |            |                              |
| Range 1: 170 to 883 <a href="#">Graphics</a>                                    |        |                                                              |           |            | ▼ <a href="#">Next Match</a> |
| Score                                                                           | Expect | Identities                                                   | Gaps      | Strand     |                              |
| 1319 bits(714)                                                                  | 0.0    | 714/714(100%)                                                | 0/714(0%) | Plus/Minus |                              |
| Query                                                                           | 1      | ATGTCTAAAGGTGAAGAATTGTTCACTGGTGTGTTCCAATTTTGGTTGAATTGGATGGT  |           |            | 60                           |
| Sbjct                                                                           | 883    | ATGTCTAAAGGTGAAGAATTGTTCACTGGTGTGTTCCAATTTTGGTTGAATTGGATGGT  |           |            | 824                          |
| Query                                                                           | 61     | GATGTTAATGGTCAAAAATTCTCTGTTTCTGGTGAGGGTGAAGGTGATGCAACATACGGT |           |            | 120                          |
| Sbjct                                                                           | 823    | GATGTTAATGGTCAAAAATTCTCTGTTTCTGGTGAGGGTGAAGGTGATGCAACATACGGT |           |            | 764                          |
| Query                                                                           | 121    | AAATTGACCTTGAAATTTATTTGCACTACTGGTAAGTTGCCTGTTCCATGGCCAACATTG |           |            | 180                          |
| Sbjct                                                                           | 763    | AAATTGACCTTGAAATTTATTTGCACTACTGGTAAGTTGCCTGTTCCATGGCCAACATTG |           |            | 704                          |
| Query                                                                           | 181    | GTTACTACTTTCTCTTATGGTGTTCATGCTTTTCTAGATACCCAGATCATATGAAACAG  |           |            | 240                          |
| Sbjct                                                                           | 703    | GTTACTACTTTCTCTTATGGTGTTCATGCTTTTCTAGATACCCAGATCATATGAAACAG  |           |            | 644                          |
| Query                                                                           | 241    | CATGACTTTTTCAAGTCTGCCATGCCCGAAGGTTATGTTCAAGAAAGAACTATATTTTAC |           |            | 300                          |
| Sbjct                                                                           | 643    | CATGACTTTTTCAAGTCTGCCATGCCCGAAGGTTATGTTCAAGAAAGAACTATATTTTAC |           |            | 584                          |
| Query                                                                           | 301    | AAAGATGACGGTAACTACAAGACACGTGCTGAAGTTAAGTTTGAAGGTGATACCTTGGTT |           |            | 360                          |
| Sbjct                                                                           | 583    | AAAGATGACGGTAACTACAAGACACGTGCTGAAGTTAAGTTTGAAGGTGATACCTTGGTT |           |            | 524                          |
| Query                                                                           | 361    | AATAGAATCGAGTTGAAAGGTATTGATTTTAAAGAAGATGGTAACATTTGGGTACACAAA |           |            | 420                          |
| Sbjct                                                                           | 523    | AATAGAATCGAGTTGAAAGGTATTGATTTTAAAGAAGATGGTAACATTTGGGTACACAAA |           |            | 464                          |
| Query                                                                           | 421    | ATGGAATACAACATAAATCTCATAATGTTTACATCATGGCAGACAAACCAAAGAATGGT  |           |            | 480                          |
| Sbjct                                                                           | 463    | ATGGAATACAACATAAATCTCATAATGTTTACATCATGGCAGACAAACCAAAGAATGGT  |           |            | 404                          |
| Query                                                                           | 481    | ATCAAAGTTAACTTCAAAATAGACACAACATTAAGATGGTTCTGTTCAATTGGCAGAC   |           |            | 540                          |
| Sbjct                                                                           | 403    | ATCAAAGTTAACTTCAAAATAGACACAACATTAAGATGGTTCTGTTCAATTGGCAGAC   |           |            | 344                          |
| Query                                                                           | 541    | CATTATCAACAAAATACTCCAATTGGTGATGGTCTGTTTGTGCCAGACAACCATTAC    |           |            | 600                          |
| Sbjct                                                                           | 343    | CATTATCAACAAAATACTCCAATTGGTGATGGTCTGTTTGTGCCAGACAACCATTAC    |           |            | 284                          |
| Query                                                                           | 601    | TTGTCTACACAATCTGCCTTGTCTAAAGATCCCAACGAAAAGAGAGATCACATGATCTTG |           |            | 660                          |
| Sbjct                                                                           | 283    | TTGTCTACACAATCTGCCTTGTCTAAAGATCCCAACGAAAAGAGAGATCACATGATCTTG |           |            | 224                          |
| Query                                                                           | 661    | TTGGAGTTTGTTACAGCTGCTGGTATTACACATGGTATGGATGAATTGTACAAA       |           |            | 714                          |
| Sbjct                                                                           | 223    | TTGGAGTTTGTTACAGCTGCTGGTATTACACATGGTATGGATGAATTGTACAAA       |           |            | 170                          |

**Fig S 4.** Nucleotide BLAST analysis result of pGKB-GFP expression cassette (sequencing with pGAP forward and 3' AOX1 primer)

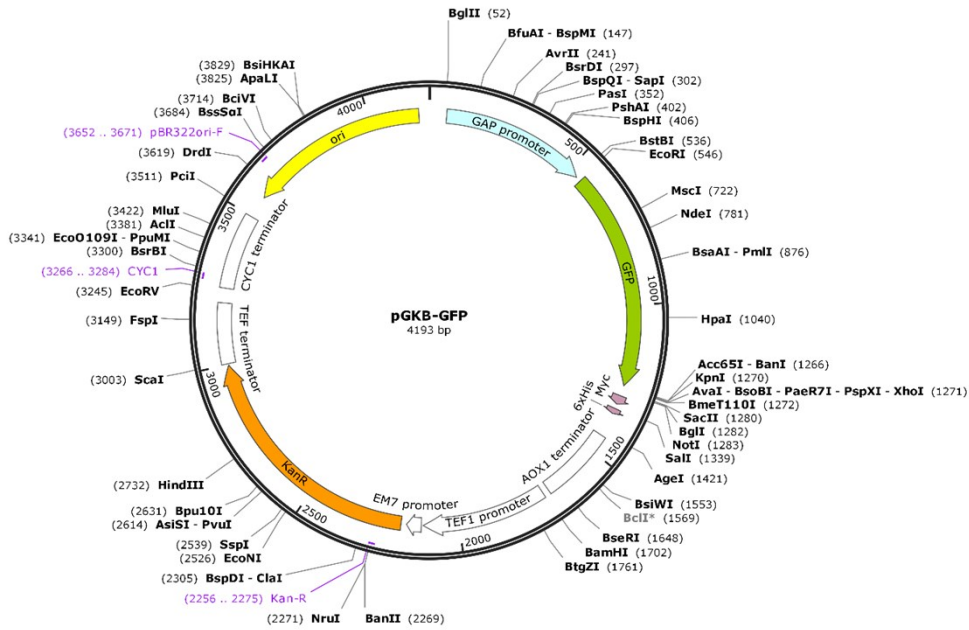

**Fig S 5.** Construction map of pGKB-GFP which is used in this study (vector map was visualized by SnapGene (SnapGene® software, www.snapgene.com).

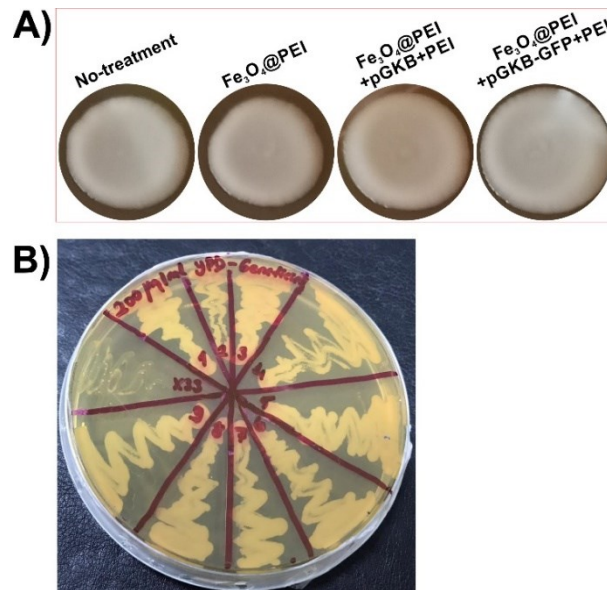

**Fig S 6. A)** Growing of the cells exposed to  $\text{Fe}_3\text{O}_4$ @PEI MNPs and magnetofectins prepared with both pGKB and pGKB-GFP ( $\text{Fe}_3\text{O}_4$ @PEI+pGKB+PEI and  $\text{Fe}_3\text{O}_4$ @PEI+pGKB-GFP+PEI) in YPD agar and, **B)** Second selection of the transformed cells in YPD plates containing geneticin (G418, 200  $\mu\text{g}/\text{mL}$ ).



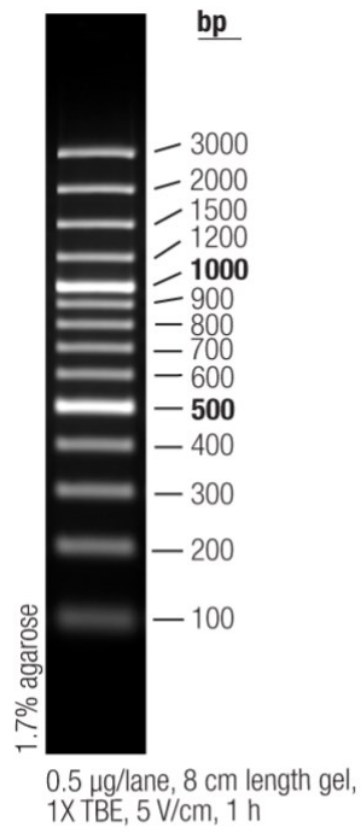

**Fig S 7.** DNA ladder used in the study (GeneRuler 100 bp Plus DNA Ladder, Thermo Scientific™).
